# Supplementary material for: Low back pain and FokI (rs2228570) polymorphism of vitamin D receptor in athletes
Source: Springer Nature journal article supplement (doi:10.1186/s13102-017-0069-x), 2017-02-06
Supplement: MOESM1 [file 12049962]

| Subject.N. | LBP_bin | Fok genotype | F1_1_FF | F1_2_Ff | F2_2_ff |
|------------|---------|--------------|---------|---------|---------|
| 1          | 0       | 1.2          | 0       | 1       | 0       |
| 2          | 0       | 1.2          | 0       | 1       | 0       |
| 3          | 1       | 1.2          | 0       | 1       | 0       |
| 4          | 1       | 1.2          | 0       | 1       | 0       |
| 5          | 0       | 1.1          | 1       | 0       | 0       |
| 6          | 0       | 1.2          | 0       | 1       | 0       |
| 7          | 1       | 1.1          | 1       | 0       | 0       |
| 8          | 0       | 1.2          | 0       | 1       | 0       |
| 9          | 0       | 1.2          | 0       | 1       | 0       |
| 10         | 0       | 1.1          | 1       | 0       | 0       |
| 11         | 1       | 1.1          | 1       | 0       | 0       |
| 12         | 1       | 1.1          | 1       | 0       | 0       |
| 13         | 1       | 1.1          | 1       | 0       | 0       |
| 14         | 1       | 1.2          | 0       | 1       | 0       |
| 15         | 1       | 1.1          | 1       | 0       | 0       |
| 16         | 1       | 1.1          | 1       | 0       | 0       |
| 17         | 1       | 1.1          | 1       | 0       | 0       |
| 18         | 1       | 1.2          | 0       | 1       | 0       |
| 19         | 0       | 1.2          | 0       | 1       | 0       |
| 20         | 0       | 1.2          | 0       | 1       | 0       |
| 21         | 1       | 1.1          | 1       | 0       | 0       |
| 22         | 1       | 1.2          | 0       | 1       | 0       |
| 23         | 1       | 1.2          | 0       | 1       | 0       |
| 24         | 0       | 1.2          | 0       | 1       | 0       |
| 25         | 0       | 1.2          | 0       | 1       | 0       |
| 26         | 0       | 1.2          | 0       | 1       | 0       |
| 27         | 1       | 1.1          | 1       | 0       | 0       |
| 28         | 0       | 1.1          | 1       | 0       | 0       |
| 29         | 0       | 1.1          | 1       | 0       | 0       |
| 30         | 0       | 1.2          | 0       | 1       | 0       |
| 31         | 0       | 1.2          | 0       | 1       | 0       |
| 32         | 0       | 1.1          | 1       | 0       | 0       |
| 33         | 0       | 1.2          | 0       | 1       | 0       |
| 34         | 0       | 2.2          | 0       | 0       | 1       |
| 35         | 0       | 1.2          | 0       | 1       | 0       |
| 36         | 0       | 1.2          | 0       | 1       | 0       |
| 37         | 0       | 1.1          | 1       | 0       | 0       |
| 38         | 0       | 1.2          | 0       | 1       | 0       |
| 39         | 0       | 1.2          | 0       | 1       | 0       |
| 40         | 0       | 1.2          | 0       | 1       | 0       |
| 41         | 0       | 1.2          | 0       | 1       | 0       |
| 42         | 1       | 1.2          | 0       | 1       | 0       |
| 43         | 1       | 1.2          | 0       | 1       | 0       |
| 44         | 0       | 1.2          | 0       | 1       | 0       |
| 45         | 1       | 1.2          | 0       | 1       | 0       |
| 46         | 1       | 1.1          | 1       | 0       | 0       |
| 47         | 0       | 1.1          | 1       | 0       | 0       |
| 48         | 0       | 1.2          | 0       | 1       | 0       |
| 49         | 0       | 1.1          | 1       | 0       | 0       |
| 50         | 0       | 1.1          | 1       | 0       | 0       |
| 51         | 0       | 2.2          | 0       | 0       | 1       |

|    |   |     |   |   |   |
|----|---|-----|---|---|---|
| 52 | 1 | 1.1 | 1 | 0 | 0 |
| 53 | 1 | 1.1 | 1 | 0 | 0 |
| 54 | 1 | 1.2 | 0 | 1 | 0 |
| 55 | 0 | 1.1 | 1 | 0 | 0 |
| 56 | 0 | 1.2 | 0 | 1 | 0 |
| 57 | 0 | 1.2 | 0 | 1 | 0 |
| 58 | 1 | 1.1 | 1 | 0 | 0 |
| 59 | 1 | 1.1 | 1 | 0 | 0 |
| 60 | 0 | 1.2 | 0 | 1 | 0 |
